# Supplementary material
Source: MDPI journal article supplement (https://www.mdpi.com/2071-1050/13/5/2572)
Supplement: s1 [file s1]

| NAME                  | FORMAT                                              | METHODS/TOOLS                                                                | STAKEHOLDERS <sup>1</sup>                   | ROLE                                    |  |
|-----------------------|-----------------------------------------------------|------------------------------------------------------------------------------|---------------------------------------------|-----------------------------------------|--|
| Kick-off event        | 1) large event<br>2) workshop                       | 1) orthophoto carpet<br>2) DIPAS<br>3) graphic recording<br>4) presentations | DHH <sup>2</sup>                            | Initiator, Director                     |  |
|                       |                                                     |                                                                              | BUKEA                                       | Supporter                               |  |
|                       |                                                     |                                                                              | steg                                        | Facilitator, Broker                     |  |
|                       |                                                     |                                                                              | Graphic designer                            | Support                                 |  |
|                       |                                                     |                                                                              | Private sector                              | Supporter (potential)                   |  |
|                       |                                                     |                                                                              | Public sector                               | Supporter (potential)                   |  |
|                       |                                                     |                                                                              | Citizens (local residents)                  | Involve                                 |  |
| ULL 1                 | 1) workshop<br>2) bilateral<br>3) meeting           | 1) ToC                                                                       | DHH <sup>2,a</sup>                          | Initiator, Director                     |  |
|                       |                                                     |                                                                              | steg <sup>a</sup>                           | Facilitator, Broker                     |  |
|                       |                                                     |                                                                              | TUHH                                        | Supporter                               |  |
|                       |                                                     |                                                                              | Citizens (local residents)                  | Involve                                 |  |
|                       |                                                     | 1) DIPAS                                                                     | <i>Local UIP: Nature experience place</i>   |                                         |  |
|                       |                                                     |                                                                              | DHH (public management office)              | Supporter                               |  |
|                       |                                                     |                                                                              | Landscape architecture company              | Facilitator                             |  |
|                       |                                                     |                                                                              | NGOs                                        | Supporter                               |  |
|                       |                                                     |                                                                              | LGV                                         | Supporter                               |  |
|                       |                                                     |                                                                              | Citizens (neighbours)                       | Empower                                 |  |
|                       |                                                     | -                                                                            | Citizens (local residents)                  | Collaborate                             |  |
|                       |                                                     |                                                                              | <i>Local UIP: Guiding system</i>            |                                         |  |
|                       |                                                     |                                                                              | NGOs                                        | Supporter                               |  |
|                       |                                                     |                                                                              | Educational institutions                    | Supporter                               |  |
|                       |                                                     |                                                                              | Church parish                               | Supporter                               |  |
|                       |                                                     |                                                                              | Private entities                            | Supporter                               |  |
|                       |                                                     |                                                                              | Landscape and communication company         | Supporter                               |  |
|                       |                                                     |                                                                              | Citizens initiative                         | Empower                                 |  |
|                       |                                                     |                                                                              | Citizens (neighbours)                       | Involve                                 |  |
|                       |                                                     |                                                                              | -                                           | <i>Local UIP: Refugees accomodation</i> |  |
| Accomodation manager  | Facilitator                                         |                                                                              |                                             |                                         |  |
| Craftsman (carpenter) | Supporter                                           |                                                                              |                                             |                                         |  |
| NGO                   | Supporter                                           |                                                                              |                                             |                                         |  |
| Citizens (refugees)   | Empower                                             |                                                                              |                                             |                                         |  |
| ULL 2                 | 1) workshop<br>2) jour fixe<br>3) bilateral meeting | 1) ToC                                                                       | DHH <sup>2,a</sup>                          | Initiator, Director                     |  |
|                       |                                                     |                                                                              | steg <sup>a</sup>                           | Facilitator, Broker                     |  |
|                       |                                                     |                                                                              | HCU                                         | Supporter                               |  |
|                       |                                                     |                                                                              | Housing company                             | Supporter                               |  |
|                       |                                                     | -                                                                            | <i>Local UIP: Green façade</i>              |                                         |  |
|                       |                                                     |                                                                              | Craftsmen (gardener and engineer)           | Supporter                               |  |
|                       |                                                     |                                                                              | Housing company                             | Director                                |  |
|                       |                                                     | -                                                                            | Citizens (tenants)                          | Consult                                 |  |
|                       |                                                     |                                                                              | <i>Local UIP: Rainwater retention basin</i> |                                         |  |
|                       |                                                     |                                                                              | HCU                                         | Supporter, Facilitator                  |  |
|                       |                                                     |                                                                              | Educational entities                        | Supporter                               |  |
|                       |                                                     |                                                                              | NGOs                                        | Supporter                               |  |
|                       |                                                     |                                                                              | Landscape architecture companies            | Supporter                               |  |
|                       |                                                     |                                                                              | Hamburg Wasser                              | Director                                |  |
| Citizens (neighbours) | Collaborate                                         |                                                                              |                                             |                                         |  |
| -                     | <i>Local UIP: Smart Flow Control</i>                |                                                                              |                                             |                                         |  |
|                       | Hamburg Wasser                                      | Director                                                                     |                                             |                                         |  |

|                                  |                                                               |                                                           |                                                       |                         |                        |
|----------------------------------|---------------------------------------------------------------|-----------------------------------------------------------|-------------------------------------------------------|-------------------------|------------------------|
|                                  |                                                               |                                                           | HCU                                                   | Supporter               |                        |
|                                  |                                                               |                                                           | TUHH                                                  | Supporter               |                        |
| ULL 3                            | 1) ToC<br>2) model building                                   |                                                           | DHH <sup>2,a</sup>                                    | Initiator, Director     |                        |
|                                  |                                                               |                                                           | steg <sup>a</sup>                                     | Facilitator, Broker     |                        |
|                                  |                                                               |                                                           | School administration                                 | Director                |                        |
|                                  |                                                               |                                                           | Citizens (teachers)                                   | Involve                 |                        |
|                                  |                                                               |                                                           | <i>Local UIP: Fischbek-Falkenberg district school</i> |                         |                        |
|                                  | 1) workshop<br>2) bilateral meeting                           | 1) model building                                         |                                                       | TUHH                    | Supporter              |
|                                  |                                                               |                                                           |                                                       | School administration   | Director               |
|                                  |                                                               |                                                           |                                                       | School building company | Supporter              |
|                                  |                                                               |                                                           |                                                       | Citizens (teachers)     | Empower                |
|                                  |                                                               |                                                           |                                                       | Citizens (pupils)       | Collaborate            |
|                                  | <i>Local UIP: Neugraben elementary school</i>                 |                                                           |                                                       | HCU                     | Supporter, Facilitator |
|                                  |                                                               |                                                           |                                                       | School administration   | Director               |
|                                  |                                                               |                                                           |                                                       | Citizens (teachers)     | Empower                |
|                                  |                                                               |                                                           |                                                       | Citizens (parents)      | Involve                |
|                                  |                                                               |                                                           |                                                       | Citizens (pupils)       | Collaborate            |
| Neugraben<br>Erleben<br>festival | 1) large event                                                | 1) orthophoto carpet<br>2) exposition<br>3) Sensafety-App | DHH <sup>2</sup>                                      | Initiator, Director     |                        |
|                                  |                                                               |                                                           | BUKEA                                                 | Supporter               |                        |
|                                  |                                                               |                                                           | LGV                                                   | Supporter               |                        |
|                                  |                                                               |                                                           | steg                                                  | Facilitator, Broker     |                        |
|                                  |                                                               |                                                           | TU Berlin                                             | Supporter               |                        |
|                                  |                                                               |                                                           | Citizens (local residents)                            | Inform                  |                        |
|                                  |                                                               |                                                           |                                                       |                         | DHH <sup>2</sup>       |
| 1st annual<br>UIP event          | 1) large event<br>organized in three<br>places<br>2) workshop | 1) model building<br>2) planting tree<br>3) presentations | BUKEA                                                 | Supporter               |                        |
|                                  |                                                               |                                                           | steg                                                  | Facilitator, Broker     |                        |
|                                  |                                                               |                                                           | Craftsmen (gardners, environmental educator)          | Supporter               |                        |
|                                  |                                                               |                                                           | HCU                                                   | Supporter               |                        |
|                                  |                                                               |                                                           | TUHH                                                  | Supporter               |                        |
|                                  |                                                               |                                                           | Citizens (local residents)                            | Inform                  |                        |
|                                  |                                                               |                                                           | Citizens (pupils)                                     | Involve                 |                        |
|                                  |                                                               |                                                           | Citizens (teachers)                                   | Collaborate             |                        |



| Role Legend            |                  |                                                        |                                                  |
|------------------------|------------------|--------------------------------------------------------|--------------------------------------------------|
|                        | <i>Role name</i> | <i>Explanation</i>                                     | <i>Source</i>                                    |
| Stakeholder and actors | Director         | Interest in achieving a shared decision                | Adapted from Dente [22] and Buseti & Vecchi [40] |
|                        | Initiator        | Central role, recognize the problem and activate other |                                                  |
|                        | Facilitator      | Facilitate the discussion among participants           |                                                  |
|                        | Supporter        | Support the decision with expert knowledge             |                                                  |
|                        | Broker           | Connecting people in the process                       |                                                  |
| Citizens               | Inform           | A uni-directional flow of information                  | Morello & Mahmoud [32], based on Arnstein [33]   |
|                        | Consult          | Asked for information or options                       |                                                  |
|                        | Involve          | Involved in the discussion and can influence decision, |                                                  |
|                        | Collaborate      | but not directly involve in decision-making            |                                                  |
|                        | Empower          |                                                        |                                                  |

<sup>1</sup> Specification of the stakeholders in brackets. The order of stakeholders follows this logic - CLEVER

<sup>2</sup> Refer to DHH District Office in charge of CLEVER Cities Hamburg coordination

<sup>a</sup> Stakeholders involved in all the local UIPs





R Cities project team, stakeholders, citizens
